# Supplementary material for: Assessing the Economic Viability of the Plastic Biorefinery Concept and Its Contribution to a More Circular Plastic Sector
Source: MDPI journal article supplement (doi:10.3390/polym13223883), 2021-11-10
Supplement: s1 [file s1]

## Supplementary information

# Assessing the economic viability of the plastic biorefinery and its contribution to a more circular plastic sector

Megan Roux and Cristiano Varrone

Table S1: Major cost inputs to the model

| Component                      | Cost (USD/kg) | Reference |
|--------------------------------|---------------|-----------|
| <b>Raw materials</b>           |               |           |
| LCC enzyme                     | 25.0          | [1]       |
| NaOH                           | 0.32          | [2]       |
| H <sub>2</sub> SO <sub>4</sub> | 0.07          | [2]       |
| THF                            | 1.53          | [3]       |
| O <sub>2</sub>                 | 0.04          | [3]       |
| Cellulose                      | 0.45          | [3]       |
| Crude glycerol                 | 0.14          | [4]       |
| <i>C. butyricum</i> culture    | 213           | [5]       |
| PDO pre-culture medium         | 0.007         | [2]       |
| PDO fermentation broth         | 0.004         | [2]       |
| Methanol                       | 0.24          | [2]       |
| Water                          | 1.33          | [6]       |
| <b>Catalysts*</b>              |               |           |
| Pt/C                           | 194           | [3]       |
| RuSn <sub>4</sub> /C           | 539           | [3]       |
| TBT                            | 150           | [7]       |
| <b>Utilities</b>               |               |           |
| Cooling water                  | 0.00005       | [2]       |
| Chilled water                  | 0.0004        | [2]       |
| Steam                          | 0.012         | [2]       |

|                                 |      |         |
|---------------------------------|------|---------|
| High pressure steam             | 0.02 | [2]     |
| Electricity**                   | 0.1  | [2]     |
| <b>Revenues</b>                 |      |         |
| Na <sub>2</sub> SO <sub>4</sub> | 1.00 | [2]     |
| Activated carbon                | 1.20 | [3]     |
| PEF                             | 2.70 | Assumed |
| PTT                             | 2.70 | Assumed |

\*Catalyst life span is assumed 6 months, with 10 % replacement at 20 % of the cost [3].

\*\*In USD/kW-h

Table S2: Inputs to the DCCF analysis

| Parameter                                     | Value | Reference |
|-----------------------------------------------|-------|-----------|
| Cost of PET pre-treatment (USD/kg PET)        | 277   | [8]       |
| Cost of labour (USD/h)                        | 34.5  | [9]       |
| Construction period (years)                   | 3     | [10]      |
| 1st year expenditures (%)                     | 8.0   | [10]      |
| 2nd year expenditures (%)                     | 60    | [10]      |
| 3rd year expenditures (%)                     | 32    | [10]      |
| Tax rate (%)                                  | 22    | [11]      |
| Depreciation (years)*                         | 5.0   | [12]      |
| Working capital (% of fixed capital)          | 15    | [12]      |
| Start-up time (years)                         | 0.5   | [10]      |
| Revenue during start-up (% of normal)         | 50    | [10]      |
| Operating costs during start-up (% of normal) | 75    | [10]      |
| Discount rate (%)                             | 10    | [10]      |

\*Straight-line depreciation over 5 years

*Table S3: Summary of capital and operating costs, and revenues.*

|                                |             |
|--------------------------------|-------------|
| Fixed capital (USD)            | 498 379 707 |
| Working capital (USD)          | 74 810 956  |
| Total capital investment (USD) | 573 550 663 |
| Revenues (USD/year)            | 391 411 846 |
| Operating costs (USD/year)     | 367 323 069 |

Table S4: DCCF of Scenario 1 in USD

|                 | 2022        | 2023         | 2024         | 2025         | 2026         | 2027         | 2028         | 2029         | 2030         | 2031         | 2032         | 2033         | 2034         | 2035         |
|-----------------|-------------|--------------|--------------|--------------|--------------|--------------|--------------|--------------|--------------|--------------|--------------|--------------|--------------|--------------|
| Revenue         |             |              |              | 195,705,923  | 391,411,846  | 391,411,846  | 391,411,846  | 391,411,846  | 391,411,846  | 391,411,846  | 391,411,846  | 391,411,846  | 391,411,846  | 391,411,846  |
| Operating Costs |             |              |              | 275,492,302  | 367,323,069  | 367,323,069  | 367,323,069  | 367,323,069  | 367,323,069  | 367,323,069  | 367,323,069  | 367,323,069  | 367,323,069  | 367,323,069  |
| Gross Profit    |             |              |              | -79,786,379  | 24,088,777   | 24,088,777   | 24,088,777   | 24,088,777   | 24,088,777   | 24,088,777   | 24,088,777   | 24,088,777   | 24,088,777   | 24,088,777   |
| Depreciation    |             |              |              | 99,747,941   | 99,747,941   | 99,747,941   | 99,747,941   | 99,747,941   |              |              |              |              |              |              |
| Net Profit      |             |              |              | -140,036,770 | -59,014,149  | -59,014,149  | -59,014,149  | -59,014,149  | 18,789,246   | 18,789,246   | 18,789,246   | 18,789,246   | 18,789,246   | 18,789,246   |
|                 |             |              |              |              |              |              |              |              |              |              |              |              |              |              |
| Cash Flow       | -39,899,177 | -299,243,824 | -234,407,662 | -40,288,829  | 40,733,793   | 40,733,793   | 40,733,793   | 40,733,793   | 18,789,246   | 18,789,246   | 18,789,246   | 18,789,246   | 18,789,246   | 18,789,246   |
| CCF             | -39,899,177 | -339,143,001 | -573,550,663 | -80,188,005  | -298,409,208 | -257,675,415 | -216,941,622 | -176,207,830 | -157,418,584 | -138,629,338 | -119,840,093 | -101,050,847 | -82,261,601  | -63,472,356  |
| DCF             | -36,271,979 | -247,308,946 | -176,113,946 | -27,517,812  | 25,292,481   | 22,993,164   | 20,902,876   | 19,002,615   | 7,968,474    | 7,244,068    | 6,585,516    | 5,986,833    | 5,442,575    | 4,947,796    |
| DCCF            | -36,271,979 | -283,580,924 | -459,694,871 | -487,212,683 | -258,288,444 | -235,295,280 | -214,392,403 | -195,389,788 | -187,421,314 | -180,177,246 | -173,591,730 | -167,604,898 | -162,162,323 | -157,214,527 |

Table S5(a): Stream table showing most important process streams relating to Fig.2 in the main report. Flows are in kg/h.

|           | 1        | 2      | 3        | 4        | 5        | 6       | 7       | 8        | 9      | 10       | 11      | 12      | 13      |
|-----------|----------|--------|----------|----------|----------|---------|---------|----------|--------|----------|---------|---------|---------|
| PET       | 6437.83  | 649.56 |          |          |          |         |         |          |        |          |         |         |         |
| LCC       | 12.86    | 12.86  |          |          |          |         |         |          |        |          |         |         |         |
| NaOH      | 1576.34  |        |          |          |          |         |         |          |        |          |         |         |         |
| H2SO4     |          |        |          | 23506.30 |          |         |         | 577.34   | 48.30  |          |         |         |         |
| Water     | 25082.45 |        | 25082.45 |          | 43889.76 |         | 4.38    | 1109.00  | 26.38  |          |         |         |         |
| EG        |          |        | 2654.25  |          | 2654.25  | 11.61   | 2609.40 |          |        |          |         |         |         |
| Na2TP     |          |        | 4710.37  |          | 0.01     | 0.01    |         |          |        |          |         |         |         |
| PTA       |          |        |          |          | 5550.30  |         |         |          |        |          |         |         |         |
| Na2SO4    |          |        |          |          | 3859.02  | 3859.02 |         |          |        |          |         |         |         |
| Cellulose |          |        |          |          |          |         |         | 16654.05 |        |          |         |         |         |
| THF       |          |        |          |          |          |         |         | 242.32   | 242.32 |          |         |         |         |
| CaOH      |          |        |          |          |          |         |         | 399.70   |        |          |         |         |         |
| HMF       |          |        |          |          |          |         |         |          |        | 5462.53  |         |         |         |
| CaSO4     |          |        |          |          |          |         |         |          | 928.74 |          |         |         |         |
| Humins    |          |        |          |          |          |         |         |          |        | 10064.04 |         |         |         |
| Oxygen    |          |        |          |          |          |         |         |          |        |          | 1664.53 |         |         |
| AC        |          |        |          |          |          |         |         |          |        |          |         | 6061.48 |         |
| FDCA      |          |        |          |          |          |         |         |          |        |          |         |         | 6328.71 |
| GVL       |          |        |          |          |          |         |         |          |        |          |         |         | 1.13    |

LCC= leaf compost cutinase, Na2TP=sodium terephthalate, THF=tetrahydrofuran, AC=activated carbon, GVL=gamma-valerolactone

Table S5(b): Stream table showing most important process streams relating to Fig.2 in the main report. Flows are in kg/h.

|                              | 14  | 15    | 16      | 17      | 18      | 19      | 20      | 21      | 22      | 23     | 24     | 25      | 26      |
|------------------------------|-----|-------|---------|---------|---------|---------|---------|---------|---------|--------|--------|---------|---------|
| Water                        |     | 9.93  |         |         |         | 978.03  | 3007    | 3311.64 | 33.27   |        |        |         |         |
| PTA                          |     |       |         |         |         |         |         |         |         |        | 902.87 | 40.63   | 40.63   |
| DMFD                         |     | 47.33 | 6148.94 |         |         |         |         |         |         |        |        |         |         |
| Methanol                     | 527 | 6.31  |         |         |         |         |         |         |         | 383.00 | 5.56   |         |         |
| PEF                          |     |       |         | 7420.96 | 5550.30 |         |         |         |         |        |        |         |         |
| <i>C. butirycum</i><br>cells |     |       |         |         |         | 5.51    | 2772.40 | 2772.40 |         |        |        |         |         |
| Fermentation<br>media        |     |       |         |         |         | 2037.90 |         |         |         |        |        |         |         |
| Glycerol                     |     |       |         |         |         | 6601.70 |         |         |         |        |        |         |         |
| FFA                          |     |       |         |         |         | 81.50   | 81.50   | 81.50   |         |        |        |         |         |
| KCl                          |     |       |         |         |         | 489.02  | 489.02  |         | 9.75    |        |        |         |         |
| PDO                          |     |       |         |         |         |         | 3630.94 | 21.17   | 3609.77 |        |        |         |         |
| DMT                          |     |       |         |         |         |         |         |         |         |        | 36.4   | 5347.97 |         |
| PTT                          |     |       |         |         |         |         |         |         |         |        |        |         | 6667.27 |

FFA=free fatty acids

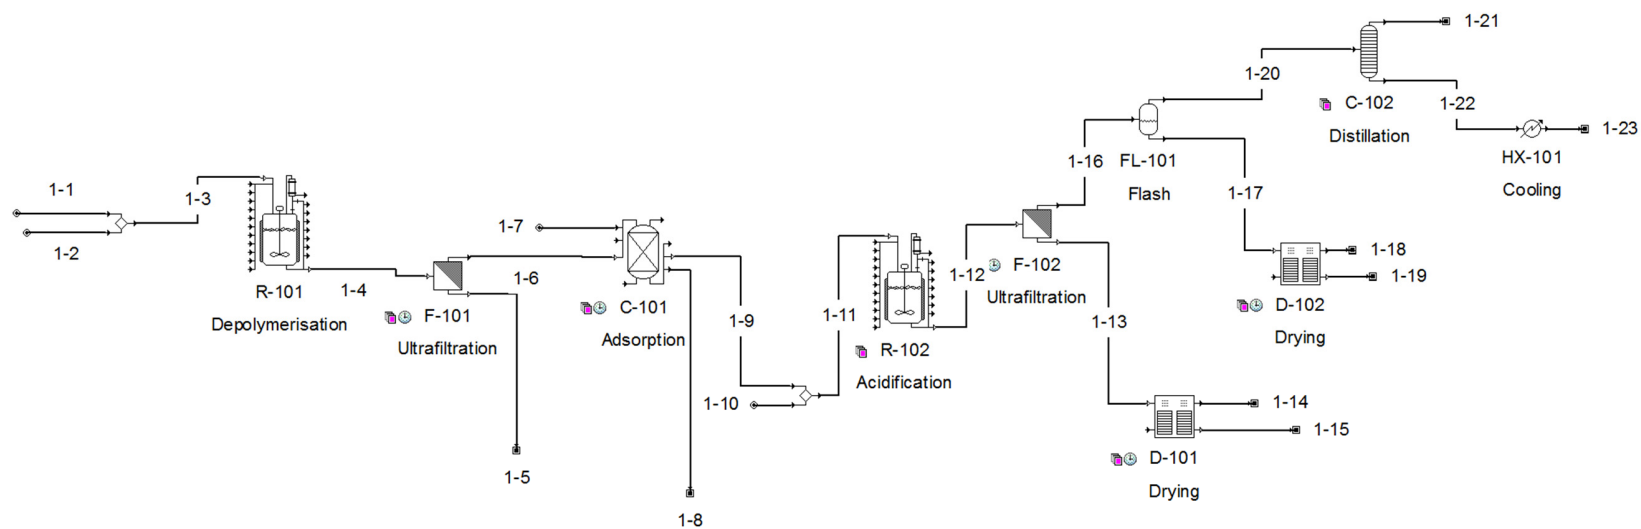

**Figure S1(a):** Process flow diagram of Area 1 (PET depolymerisation). Stream 1-1: PET, stream 1-15: PTA, stream 1-19: Na<sub>2</sub>SO<sub>4</sub>, stream 1-23: EG.



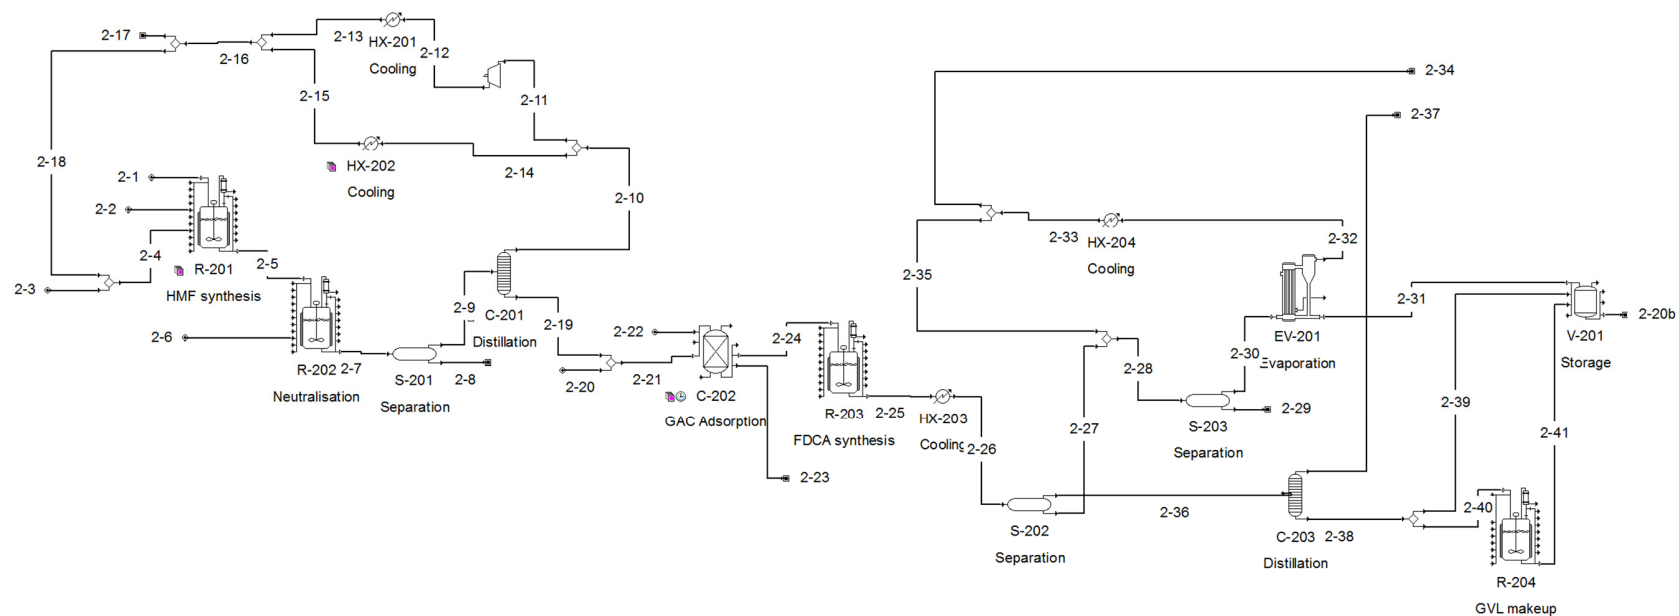

**Figure S1(b):** Process flow diagram of Area 2 (FDCA production). Stream 2-1: cellulose, stream 2-29: FDCA, stream 2-20b: GVL recycle to stream 20 (not implemented due to limit in number of unit operations, but modelled in stream 2-20)

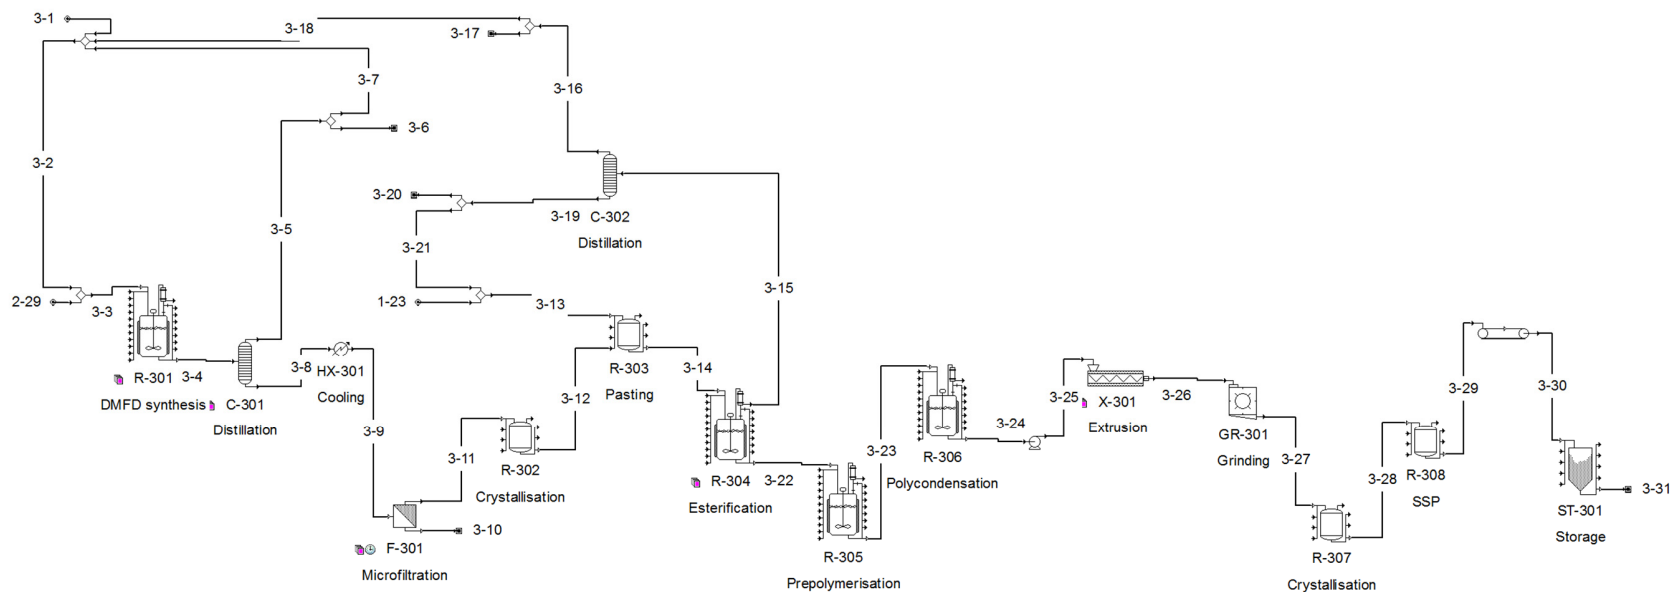

**Figure S1(c):** Process flow diagram of Area 3 (PEF synthesis). Stream 2-29: FDCA, stream 3-1: methanol make-up, stream 1-23: EG, stream 3-31: PEF.

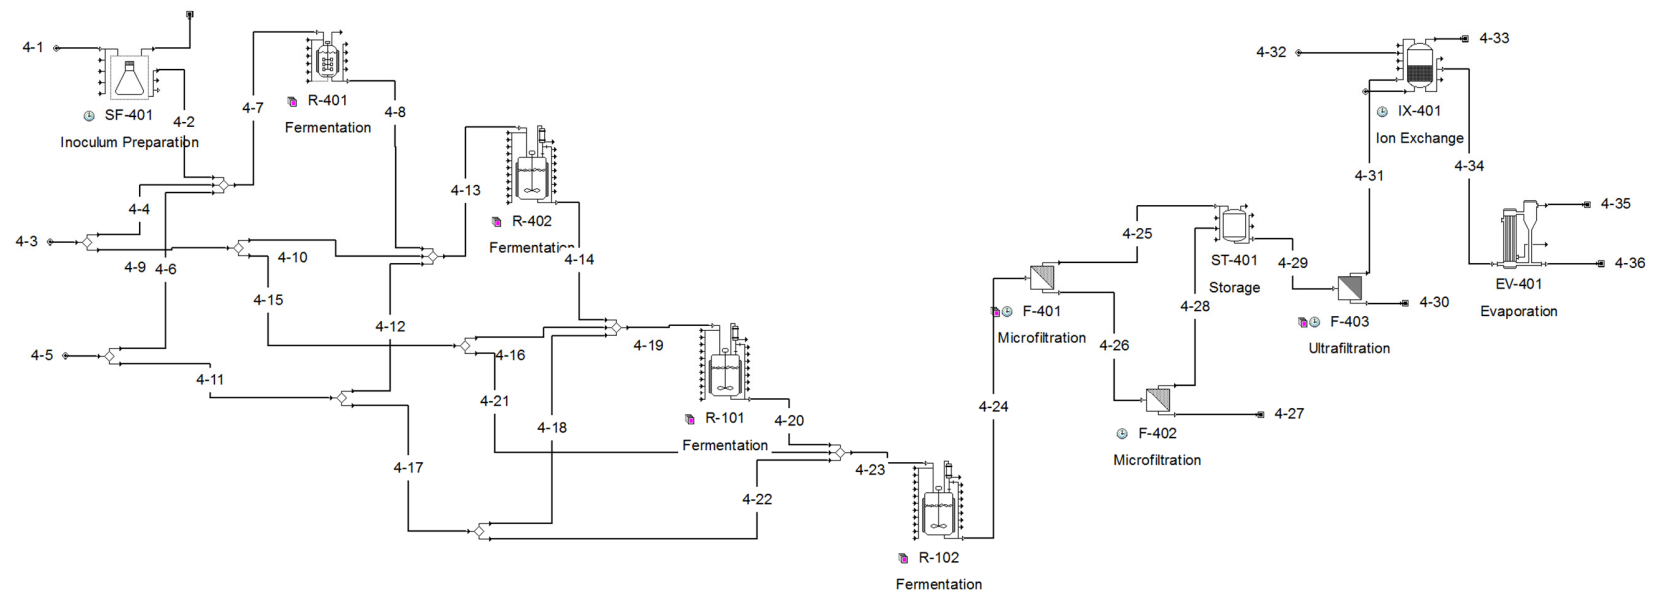

**Figure S1(d):** Process flow diagram of Area 4 (PDO production). Stream 4-1: starter culture, stream 4-3: fermentation media, stream 4-5: crude glycerol, stream 4-36: PDO.

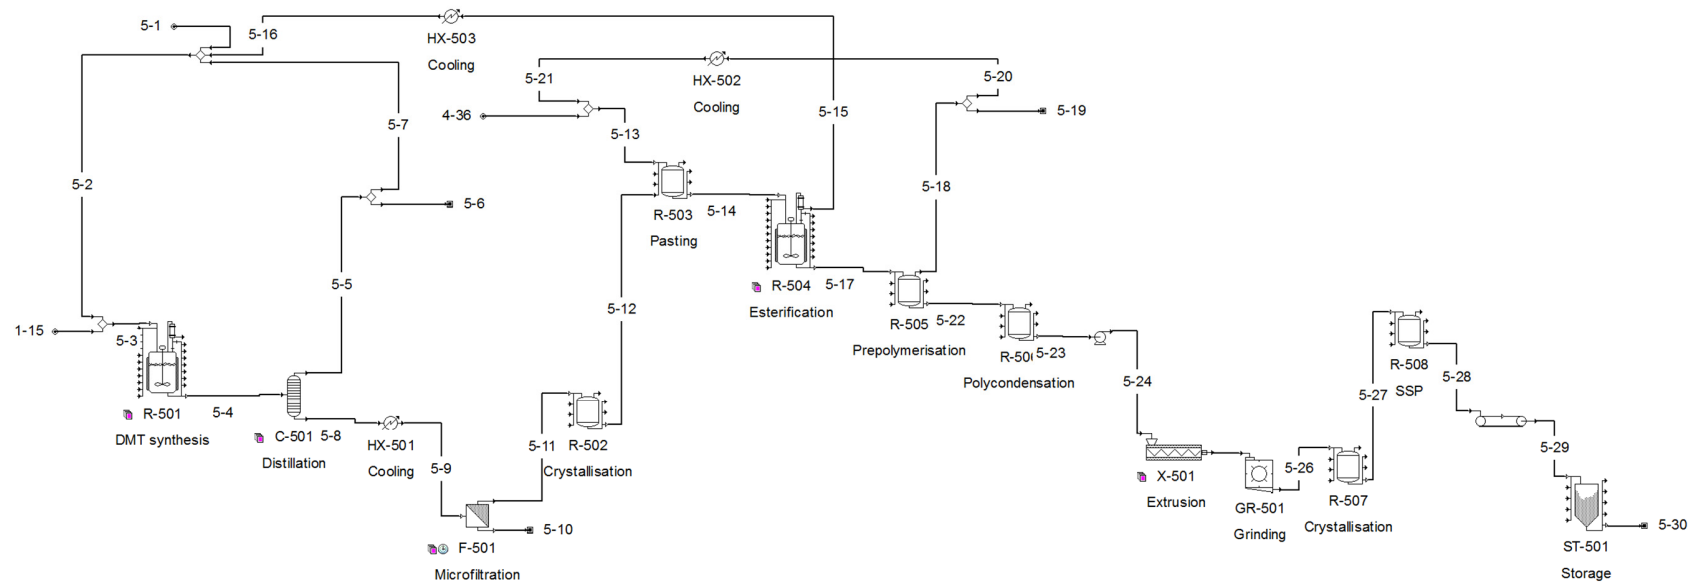

**Figure S1(e):** Process flow diagram of Area 5 (PTT synthesis). Stream 1-15: PTA, stream 5-1: methanol make-up, stream 4-36: PDO, stream 5-30: PTT.

## References:

1. Tournier, V.; Topham, C. M.; Gilles, A.; David, B.; Folgoas, C.; Moya-Leclair, E.; Kamionka, E.; Desrousseaux, M. -L.; Texier, H.; Gavalda, S.; Cot, M.; Guémard, E.; Dalibey, M.; Nomme, J.; Cioci, G.; Barbe, S.; Chateau, M.; André, I.; Duquesne, S.; Marty, A. An engineered PET depolymerase to break down and recycle plastic bottles. *Nature* **2020**, *580*, pp. 216-219. doi:10.1038/s41586-020-2149-4.
2. Intelligen, Inc. SuperPro Designer Database, **2021**.
3. Kim, H.; Choi, J.; Park, J.; Won, W. Production of a sustainable and renewable biomass-derived monomer: conceptual process design and techno-economic analysis. *Green Chem.* **2020**, *22*, pp. 7070-7079. doi:10.1039/d0gc02258f.
4. Nomanbhay, S.; Hussein, R.; Ong, M. Y. Sustainability of biodiesel production in Malaysia by production of bio-oil from crude glycerol using microwave pyrolysis: a review. *Green Chemistry Letters and Reviews* **2018**, *11*(2), pp. 135-157. doi: 10.1080/17518253.2018.1444795.
5. Public Health England, **2021**. *Bacteria Collection: Clostridium butyricum*. [Online]. Available at: <https://www.phe-culturecollections.org.uk/products/bacteria/detail.jsp?refId=NCTC+7423&collection=n=nctc#medDoc>. [Accessed 17 April 2021].
6. European Environment Agency, **2012**. *Agricultural, industrial and household water prices in late 1990s*. [Online]. Available at: <https://www.eea.europa.eu/data-and-maps/figures/agricultural-industrial-and-household-water-prices-in-late-1990s>. [Accessed 15 August 2021].
7. Sigma-Aldrich, **2021**. *Titanium(IV) butoxide*. [Online]. Available at: <https://www.sigmaaldrich.com/catalog/product/aldrich/244112?lang=en&region=DK>. [Accessed 17 August 2021].
8. Singh, A.; Rorrer, N. A.; Nicholson, S. R.; Erickson, E.; DesVeaux, J. S.; Avelino, A. F. T.; Lamers, P.; Bhatt, A.; Zhang, Y.; Avery, G.; Tao, L.; Pickford, A. R.; Carpenter, A. C.; McGeehan, J. E.; Beckham, G. T. Techno-economic, life-cycle, and socioeconomic impact analysis of enzymatic recycling of poly(ethylene terephthalate). *Joule* **2021**, *5*, pp.1-25. doi:10.1016/j.joule.2021.06.015.
9. SalaryExplorer, **2021**. *Chemical Plant Operator Average Salary in Denmark 2021*. [Online]. Available at: <http://www.salaryexplorer.com/salary-survey.php?loc=58&loctype=1&job=12174&jobtype=3>. [Accessed 15 August 2021].
10. Davis, R.; Tao, L.; Tan, E. C. D.; Biddy, M. J.; Beckham, G. T.; Scarlata C.; Jacobsen, J.; Cafferty, K.; Ross, J.; Lukas, J.; Knorr, D.; Schoen, P. Process Design and Economics for the Conversion of Lignocellulosic Biomass to Hydrocarbons: Dilute-Acid and Enzymatic Deconstruction of Biomass to Sugars and Biological Conversion of Sugars to Hydrocarbons. National Renewable Energy Laboratory (NREL) Report, **2013**, NREL/TP-5100-60223.
11. Copenhagen Capacity, **2021**. *Taxation in Denmark*. [Online]. Available at: <https://www.copcap.com/set-up-a-business/taxation>. [Accessed 20 August 2021].
12. Seider, W. D.; Seader, J. D.; Lewin, D. R.; Widago, S. *Product and Process Design Principles: Synthesis, Analysis, and Evaluation*, 3rd ed.; John Wiley & Sons, Inc., United States of America, **2009**; pp. 534-627.
